# Seasonal variations and time trends of deaths from COVID-19 in Italy, September 2021 - September 2024: a segmented linear regression study

Marco Rocchetti  
[marco.rocchetti@unibo.it](mailto:marco.rocchetti@unibo.it)  
University of Bologna,  
Department of Computer Science and Engineering  
Bologna, Italy

Eugenio Maria De Rosa  
[eugeniomaria.derosa@studio.unibo.it](mailto:eugeniomaria.derosa@studio.unibo.it)  
University of Bologna,  
Department of Computer Science and Engineering  
Bologna, Italy

**Corresponding Author:** Marco Rocchetti

**Affiliation:** University of Bologna, Department of Computer Science and Engineering, Bologna, Italy

**Email Address:** [marco.rocchetti@unibo.it](mailto:marco.rocchetti@unibo.it)

Word Count: 3801

## Abstract

**Objectives:** To investigate the occurrence of seasonal variations of COVID-19 deaths in Italy over a period during which the SARS-CoV-2 Omicron and post-Omicron variants were predominant: September 2021 - September 2024.

**Design:** We examined the seasonal profiles of weekly COVID-19 deaths data, over a three-year long period, using a segmented linear regression model. Comparing the slopes of the regression segments, we are able to discuss the variation in steepness of the Italian COVID-19 mortality trend, identifying the corresponding growth/decline profile for each considered season.

**Settings:** Public data of weekly COVID-19 deaths over a three-year long period in Italy.

**Participants:** Only publicly available data were utilized for this study, patients and/or the public were not involved in any phase of this study.

**Interventions:** Not applicable, not being proposed any interventions.

**Primary and secondary outcome measures:** Not applicable, being this study not based on a protocol with preliminary planned measures.

**Results:** Although the COVID-19 weekly death mortality has been in a declining trend in Italy since the end of 2021 until the end of 2024, we have identified increasing variations of the COVID-19 deaths for all winters and summers of that period. These increasing mortality variations were more pronounced in winters (average slope coefficient of the regression segments: 55.75, average and SD values of the coefficient of determination  $r^2$ : 0.74 and 0.05) than in summers (average slope coefficient of the regression segments: 22.90, average and SD values of the coefficient of determination  $r^2$ : 0.63 and 0.19). We found that COVID-19 deaths were, instead, less frequent in the intermediate periods between winters and summers (average slope coefficient of the regression segments: -38.01, average and SD values of the coefficient of determination  $r^2$ : 0.70 and 0.06).

**Conclusion:** Favored by a declining COVID-19 mortality trend in Italy in the period from September 2021 to September 2024, the occurrence of increasing alterations (from serious to moderate) received little attention. These transient rises of the trend have been present both in winters and in summers, but more pronounced in winters. Since these increasing seasonal alterations of the COVID-19 mortality trend have been always compensated by consistent downward drifts occurring during the intermediate periods between winters and summers, they have been considered cause for concern, only occasionally.

## Article Summary

### Strengths and Limitations of this Study

- Using a segmented linear regression offers the advantage of a temporal decomposition of the time series of the COVID-19 deaths data, allowing to identify the seasonal variations of mortality over a relatively long period.

NOTE: This preprint reports new research that has not been certified by peer review and should not be used to guide clinical practice.

- Applying a segmented linear regression represents an appropriate method to differentiate between severe and moderate variations of the COVID-19 deaths trend, distinguishing seasonal alterations from minimal upward/downward drifts of the time series.
- We avoided to investigate the reasons behind the seasonal variations of the COVID-19 death time series, which could be the reflection of several causes, including: climatic and environmental factors, dense gathering of people in specific circumstances, decreasing immunity from previous infections and vaccinations.
- The time series of the weekly COVID-19 deaths data was not normalized or corrected and it comprised a relatively extended period characterized by the circulation of a long list of Omicron and post-Omicron subvariants, started in the high fall of 2021.
- The period covered by the data extends from the end of 2021 to the end of 2024, including three winters and three summers; however, there is reason to believe that the associations we found still exist.

**Keywords:** *COVID-19 Deaths; Seasonal COVID-19 Mortality Variations; Segmented Linear Regression; Omicron and Post-Omicron Variants; Italy.*

## Introduction

The COVID-19 pandemic has become a subject of increasing and widespread concern for Italy, particularly with the Omicron variant and its swiftly mutating sub-lineages which stabilized as the predominant cause of infection for almost three years, corresponding to a period which extended from September 2021 to September 2024 [1]. Fortunately, a broad spectrum of timely response strategies (including vaccination) has resulted in a progressively reduced COVID-19 mortality [2], which has followed a declining trend, from an average number of weekly deaths of almost 1000 in the period October 2021 - September 2022 to around 100 in the period October 2023 - September 2024 [3, 4].

Despite the decision with which the World Health Organization (WHO), on May 5, 2023, announced the end of the emergency phase and the beginning of the COVID-19 post-pandemic era [5], the virus has not been eradicated, and with each new winter season the question remains if, like many other respiratory virus illnesses, COVID-19 could peak during the winter, favored by: new variants, decreasing immunity from previous infections and vaccinations, environmental conditions, human behaviors like dense people gathering, relaxation of public health measures for prevention and control [6, 7, 8].

The question above, about the possibility of COVID-19 following a one-year seasonal pattern similar to many other viral infections, has been intensively discussed by the scientific community. Two opposite sides have appeared quite clearly: on one side, those convinced of the existence of a seasonal pattern that repeats over a fixed one-year period (at least, in all the Western countries) [9]; on the other, those bringing to the table evidences of several repeating outbreaks, not necessarily occurring on a yearly basis [10]. We have had this discussion repeated many times, over these years, in Italy, with the two sides offering mostly the same arguments, with occasional country-specific remarks.

In this complex context, despite there is accumulating evidence against the hypothesis of a sinusoidal seasonality of the COVID-19 illness assumed to recur over a one-year period solely, an analysis of the time series of the COVID-19 deaths in Italy, over the period end of 2021 - end of 2024, has shown the presence of recurrent alterations in this mortality trend that are not simply attributable to occasional upward/downward drifts of the data time series [11].

This was the motivation for better investigating the occurrence of seasonal variations of COVID-19 mortality in Italy, over the period during which the initial Omicron variant diversified into multiple sub-variants that gained an extremely increased survival fitness, leading to pandemic waves recurring in different seasons of the same year. To identify the seasonal profiles of deaths from COVID-19 in the period of interest, we adopted a mathematical approach resulting in a segmented linear regression model of the COVID-19 deaths data, where each increasing/decreasing seasonal death trend variation corresponds to a regression segment with a given steepness. Comparing the slopes of these regression segments, we have been able to discuss the alterations of the mortality trend, identifying the corresponding growth/decline profiles for each considered season. The utilized time series of COVID-19 deaths data is publicly available and it is provided by both the Italian Civil Protection Department and the Italian Ministry of Health, on a weekly basis. This allowed us to identify non-occasional variations of the number of deaths from COVID-19, over the three-year long period of interest, with increasing alterations of the mortality trend present both in winters and in summers, but more pronounced in winters.

## Methods

We decided to work with the time series of the Italian COVID-19 deaths data, to which some simple transformations were applied as described in the following. We fitted a segmented linear regression model [12], where the dependent variable was the number of weekly confirmed COVID-19 deaths, and the independent variable was the number of weeks since 23

September 2021 until 19 September 2024, totaling 157 weeks. The result has been a model comprised of a series of segments, each connecting two points, beginning at one and ending at the other. Unlike a continuous line, regression segments are defined by these two points. Those couples of points were chosen based on two different criteria to discern an increasing variation of the deaths data time series from a decreasing one. For an increasing variation, the starting point was chosen in correspondence with the beginning of a given pandemic wave, while the corresponding end point was the point in time when that wave peaked. As to a decreasing variation, the starting point was chosen in correspondence with the weeks immediately subsequent to a peak, while the end point corresponded to the time when that wave returned to baseline values. Since micro oscillations of the number of weekly deaths (up to +/- 15%) are possible along a path of consecutive points of a deaths time series (both during an ascending and a descending phase), the rule above was not implemented strictly, sometime allowing oscillating, but near, points not to be interpreted as a definitive change of direction of the deaths trend, from increasing to decreasing, or vice versa. This occurs quite typically at the beginning of a wave or during the weeks after it has peaked.

Given the existing literature that hypothesizes that winters and summers are the seasons when COVID-19 waves often occur [13, 14], we focused our attention on those two seasons. Taking into account the specificity of the Italian climate, we considered an extended definition of the winter season which also included high fall, with a corresponding timeframe extending from beginning of September to end of January. As to summer, we considered a timeframe starting from end of May/beginning of June to end of August. Within the extension of these two timeframes, we looked for increasing trends of COVID-19 deaths, each with a duration of at least six weeks (one month and a half). Choosing six weeks comes from the working definition of COVID-19 waves as provided in reference [15] where the three quarters of the upward trends of many studied COVID-19 waves lasted something more than a month. Similarly, for the downward trends. With this initial analysis we identified three fall-winter periods (from now on, only wither for short) and three summer periods, where noticeable increasing trends of the COVID-19 mortality can be observed. What remains of the COVID-19 deaths data time series, after that the six periods with ascending trends are removed, corresponds exactly to three periods where, not surprisingly, noticeable descending trends of the COVID-19 mortality time series can be identified. It is interesting to point out that all these three periods, with declining COVID-19 mortality profiles, are set in between the end of winters and before the beginning of the subsequent summers, a kind of extended spring periods. For that reason, we have indicated those periods with the term *intermediate*. As a result of the preliminary procedures described above, the initial COVID-19 deaths data time series was divided over nine different periods, six of which with increasing mortality trends and three with decreasing trends. The first and the last week of each identified period represent, respectively, the starting and the end points of the regression segments we will try to fit with our regression model.

A graphical summary of the entire COVID-19 deaths data time series is plotted in Figure 1, where all the nine periods are represented with colored sectors to differentiate winters, summers and intermediate seasons. In particular, blue nuances are for winters, red nuances for summers and grey ones for intermediates. The six peaks coming at the culmination of the six ascending trends mentioned above are put in evidence, in the Figure, with big red dots. They occurred in correspondence of the weeks ending with the following dates: January 28, 2022 (2,575 weekly deaths); July 7, 2022 (1,111 weekly deaths); December 16, 2022 (798 weekly deaths); October 12, 2022 (197 weekly deaths); December 14, 2023 (425 weekly deaths) and August 22, 2024 (135 weekly deaths). For the sake of completeness, with big yellow dots, we have also marked the principal local minima of the death data time series.

Table 1, instead, reports the dates corresponding to the starting and the end points of each period depicted in Figure 1, to be used to compute the regression segments of our model. The mean duration in weeks of winter, summer and intermediate periods is, respectively: 17.66, 12.33 and 22.33, with SD values respectively of: 1.25, 3.30, 3.40 weeks. The number of deaths, divided over the three years of interest, is reported in the rightmost column of the Table (both cumulative and averaged per week). Obviously, here, we are treating the concept of season as super-long (or even slightly reduced) periods of cold and warm, plus other characterizing climatic factors; not seasons in an astronomical sense with a strictly respect for when equinoxes and solstices occur. In this sense, it is of particular relevance the case of Summer 2022 when a very rapid wave occurred, peaking on July 22, 2022 with a record number of weekly deaths of 1,111 and a relatively small duration in time.

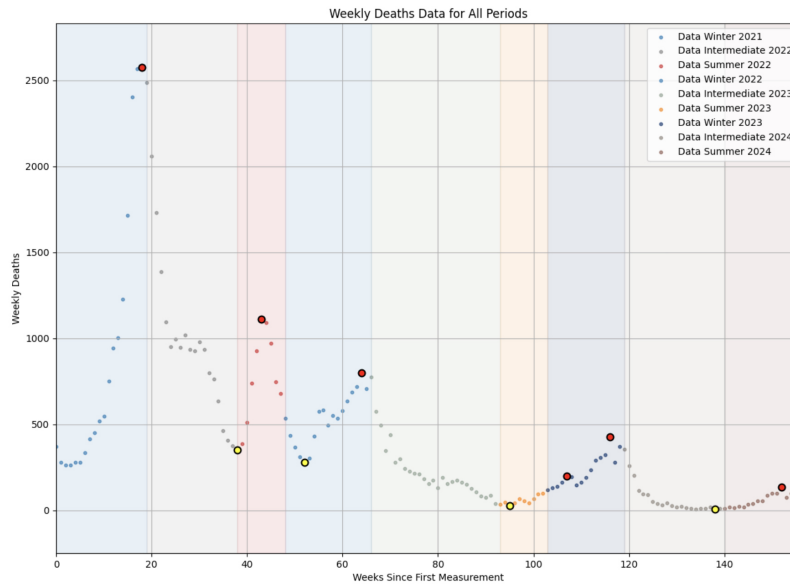

**Figure 1:** COVID-19 deaths data time series, since 23 September 2021 until 19 September 2024: on the y axis the number of weekly deaths; on the x axis the weeks from 1 to 157. Colored sectors identify different periods with their seasonal mortality trends. Blue nuances for fall-winter; red nuances for summer; grey nuances for intermediate periods. The six peaks of the six ascending trends are plotted with big red dots. Weeks, dates and number of weekly deaths for the six peaks are, respectively, from left to right in the Figure: 18<sup>th</sup> week, January 28, 2022, 2.575 deaths; 43<sup>rd</sup> week, July 7, 2022 (1.111 deaths; 64<sup>th</sup> week, December 16, 2022, 798 deaths; 107<sup>th</sup> week, October 12, 2022, 197 deaths; 116<sup>th</sup> week, December 14, 2023, 425 deaths and 154<sup>th</sup> week, August 22, 2024, 135 deaths. Yellow dots represents the main local minima.

| Period            | Season type     | Deaths trend | Number of weeks | Date of the beginning point for the regression segment | Date of the end point for the regression segment | Number of COVID-19 deaths                  |
|-------------------|-----------------|--------------|-----------------|--------------------------------------------------------|--------------------------------------------------|--------------------------------------------|
| Winter 2021       | Fall-Winter     | Increasing   | 19              | September 23, 2021                                     | January 28, 2022                                 | 44,576 cumulative<br>928,67 weekly average |
| Intermediate 2022 | Extended Spring | Decreasing   | 19              | February 4, 2022                                       | June 10, 2022                                    |                                            |
| Summer 2022       | Summer          | Increasing   | 10              | June 17, 2022                                          | August 19, 2022                                  |                                            |
| Winter 2022       | Fall-Winter     | Increasing   | 18              | August 26, 2022                                        | December 23, 2022                                | 16,349 cumulative<br>297,25 weekly average |
| Intermediate 2023 | Extended Spring | Decreasing   | 27              | December 30, 2022                                      | June 30, 2023                                    |                                            |
| Summer 2023       | Summer          | Increasing   | 10              | July 7, 2023                                           | September 7, 2023                                |                                            |
| Winter 2023       | Fall-Winter     | Increasing   | 16              | September 14, 2023                                     | December 28, 2023                                | 6,160 cumulative<br>114,07 weekly average  |
| Intermediate 2024 | Extended Spring | Decreasing   | 21              | January 4, 2024                                        | May 23, 2024                                     |                                            |
| Summer 2024       | Summer          | Increasing   | 17              | May 30, 2024                                           | September 19, 2024                               |                                            |

**Table 1:** Period, Season type, Increasing/Decreasing trend, Number of weeks of the period, dates of beginning and end points, number of deaths (cumulative and weekly average). Mean duration in weeks of winter, summer and intermediate periods are, respectively: 17.66, 12.33 and 22.33 (SD: 1.25; 3.30; 3.40).

The segmented (or piecewise) regression model, to fit with the data of Figure 1, follows the formula [16]:

$$Y = \beta_0 + \beta_1 \cdot X + \varepsilon,$$

where  $Y$  corresponds the number of weekly COVID-19 deaths and  $X$  represents the passage of time measured in weeks.  $\beta_0$  is the intercept, that is the value of  $Y$  when  $X$  is equal to 0;  $\beta_1$  is the slope (or slope coefficient) of a regression segment and indicates the steepness of that segment. Finally,  $\varepsilon$  represent the error term. In essence, with our study we are trying to find estimated values for the  $\beta$  parameters which can provide the best fit with the available data. In this sense, it is important the role played by the coefficient of determination  $r^2$ , which is a very informative parameter needed to evaluate the goodness-of-fit of the simulated  $Y$  values (of the entire segment) versus the measured  $Y$  values (i.e., the available data). Moreover, we compute the regression function of the formula above in segments (i.e. pieces), with the idea that the COVID-19 deaths data follow different linear trends over the different periods, the colored regions of the data time series represented in Figure 1. Our segments will obviously result to be not connected, which is typical when the function to fit presents several alternating upward/downward oscillations. Summarizing, our model will return the values of the  $\beta_0$  and  $\beta_1$  parameters for all segments, which, in turn, will be used to evaluate the variation of the steepness of the COVID-19

death trends for the seasons of interest. With the values of  $r^2$ , finally, we will evaluate how well our segments fit with the available data.

To conclude, it is to notice that all the initial COVID-19 deaths data are downloadable from two public, open access repositories, specifically: i) the repository maintained by the Italian Civil Protection Department, under the Italian Presidency of the Council of Ministers (<https://github.com/pcm-dpc/COVID-19/blob/master/dati-andamento-nazionale> - folder: *dati-andamento-nazionale*), and ii) the repository maintained by the Italian Ministry of Health, (<https://www.salute.gov.it/portale/nuovocoronavirus/archivioBollettiniNuovoCoronavirus.jsp>). The transformed data presented in Figure 1, plus the code we developed to develop our segmented regression model, can be downloaded from: [https://github.com/EugenioDeRosa/Covid-19\\_Linear\\_Regression.git](https://github.com/EugenioDeRosa/Covid-19_Linear_Regression.git). All the results of this study are fully reproducible by using the method described in this Section, plus the data and the code available at the link above. Further reasonable requests relative to the data and the code can be also addressed to the corresponding author (email: [marco.rocchetti@unibo.it](mailto:marco.rocchetti@unibo.it)).

### Patient and Public Involvement

Patients and/or the public were not involved in the design, or conduct, or reporting, or dissemination plans of this research.

## Results

Figures 2-4 show the regression segments obtained with our piecewise regression model for all the winter, summer and intermediate periods (of Figure 1). Figure 2 is comprised of three different plots. From top to bottom the regression segments for: Winter 2021, Winter 2022, Winter 2023. Similarly for Figure 3. From top to bottom: Summer 2022, Summer 2023 and Summer 2024. Finally, Figure 4. From top to bottom: Intermediate 2022, Intermediate 2023 and Intermediate 2024. Each plot reports also the dates of the beginning and the end of the considered periods. In all the plots,  $Y$  represents the number of weekly COVID-19 deaths for each given week registered along the  $x$  axis.

Each plot comes with the values of the parameters  $\beta_0$  and  $\beta_1$ . In the specific case of our model,  $\beta_1$  indicates the rate, or the velocity, with which our segment reflects an increasing/decreasing mortality trend, while  $\beta_0$  registers the portion of  $Y$  (number of deaths) not influenced by  $X$  (passage of time), that is the initial value of the number of COVID-19 deaths registered at the time when that given increasing/decreasing trend has started. Precisely,  $\beta_0$  indicates the situation prior to the beginning of a given increasing/decreasing mortality trend. The larger the difference between  $\beta_0$  and the final value reached at the end of the segment, the stronger the impact of the increasing/decreasing trend on the number of deaths for that specific seasonal period.  $\beta_1$  informs about the change of the dependent variable  $Y$  (number of deaths) for a one week increase in the passage of time ( $X$ ). The larger  $\beta_1$ , the steeper the slope of the segment, and correspondingly the speedier the increase/decrease of the number of deaths. The value of  $r^2$  accompanies each plot, helping to evaluate the goodness-of-fit of the computed segment for that seasonal period.

Several facts are noteworthy in Figures 2-4. First, we can observe that: all the winter periods follow an increasing COVID-19 mortality trend, with positive values of the slope coefficients. Similarly, all the summer periods follow an increasing mortality trend, while all the intermediate periods decline along a decreasing trend, with negative values of the slope coefficients. Second, the increasing trends of winters and summers are different. The increasing mortality trend of winters (Figure 2) is more pronounced, with an average  $\beta_1$  of 55.75 versus an average  $\beta_1$  for summers of 22.90 (Figure 3). Third, there is a high variance of the slope coefficients within similar periods of different years. Take winters: we begin with a  $\beta_1$  of 126.45 ( $\beta_0 = -233.70$ ) for Winter 2021, we proceed with a  $\beta_1$  of 23.28 ( $\beta_0 = 330.72$ ) for Winter 2022 and we conclude with a  $\beta_1$  of 17.52 ( $\beta_0 = 97.99$ ) for Winter 2023, yielding a SD for  $\beta_1$  of 61.29, thus confirming the overall declining COVID-19 mortality trend over the three different winter seasons from 2021 to 2023. This situation repeats quite similar during the summer periods, with the following values: Summer 2022 ( $\beta_1 = 54.80$ ,  $\beta_0 = 504.40$ ), Summer 2023 ( $\beta_1 = 6.72$ ,  $\beta_0 = 26.72$ ), Summer 2024 ( $\beta_1 = 7.20$ ,  $\beta_0 = 4.70$ ). The SD for  $\beta_1$  is equal to 22.55. The situation for intermediate periods is just at the opposite (Figure 4). Although negative, we here observe the slope becoming progressively less negative going from 2022 to 2024, with an average value of the  $\beta_1$  coefficient of -38.01 (SD 32.87) and a series of consecutive values (2022 - 2024) of  $\beta_1$  (and  $\beta_0$ ) which are as follows: -84.38 (1805.90); -17.76 (462.91); -11.89 (187.10). In the end, the decreasing trends of the COVID-19 mortality observed during all the three intermediate periods (and reflected by the negative values of the corresponding slopes), plus their relatively long duration in time, have played the important role of compensating the upward drifts registered during winters and summers, thus contributing to the general declining trend of the COVID-19 mortality over the entire period (September 2021 – September 2024).

Coming to the  $r^2$  values, they confirm that our segmented linear model has a very good fit with the initial COVID-19 deaths data (with just an exception). In fact, the winter periods (Figure 2) show very good  $r^2$  values, precisely: Winter 2021 ( $r^2 = 0.76$ ), Winter 2022 ( $r^2 = 0.67$ ), Winter 2023 ( $r^2 = 0.80$ ), with an average  $r^2$  of 0.74 (SD 0.05). Similarly for the intermediate periods: Intermediate 2022 ( $r^2 = 0.77$ ), Intermediate 2023 ( $r^2 = 0.71$ ), Intermediate 2024 ( $r^2 = 0.62$ ), with an

average  $r^2$  of 0.70 (SD 0.06). Something slightly different happens for summers with the following values; Summer 2022 ( $r^2 = 0.36$ ), Summer 2023 ( $r^2 = 0.70$ ), Summer 2024 ( $r^2 = 0.82$ ), yielding an average  $r^2$  value of 0.63 (SD 0.19). The low value of  $r^2$  for Summer 2022 is a consequence of what happened during that season, when a rapid ascending trend of COVID-19 deaths was registered, beginning approximately at mid of June 2022, but peaking very soon on July 7 with 1,111 deaths, to return to its previous baseline values at mid of August [17]. This rapid up and down of this summer pandemic wave, occurring in only ten weeks, unfortunately, does not find a very good fit with a linear model. Our model in fact returns a slope which does not reflect very well the speedy change from an upward to a downward drift of the COVID-19 mortality profile registered in those weeks, thus explaining the low value of  $r^2$  for that period. It is also important to note that all the  $p$ -values returned during the linear regression computations of our model are to a large degree below the significative value of  $\alpha = 0.05$ .

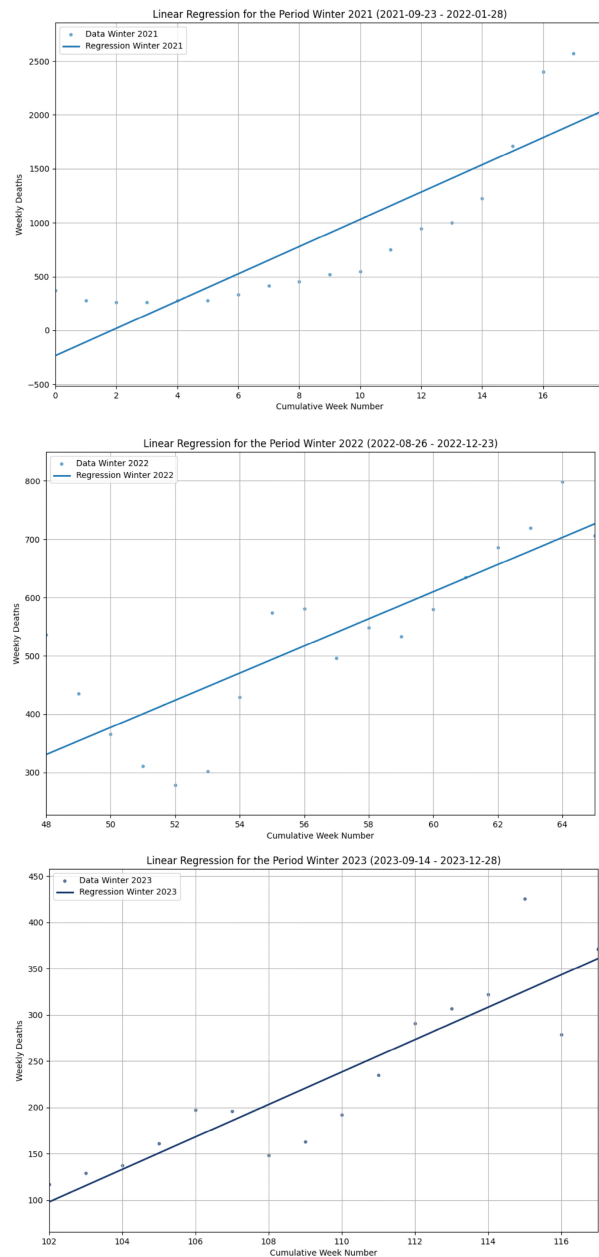

**Figure 2:** Regression segments for the winter periods. Top: Winter 2021 ( $\beta_1 = 126.45$ ,  $\beta_0 = -233.70$ ,  $r^2 = 0.76$ ). Middle: Winter 2022 ( $\beta_1 = 23.28$ ,  $\beta_0 = 330.72$ ,  $r^2 = 0.67$ ), Bottom: Winter 2023 ( $\beta_1 = 17.52$ ,  $\beta_0 = 27.99$ ,  $r^2 = 0.80$ ). Average  $\beta_1 = 55.75$ . Average  $r^2 = 0.74$  (SD 0.05).

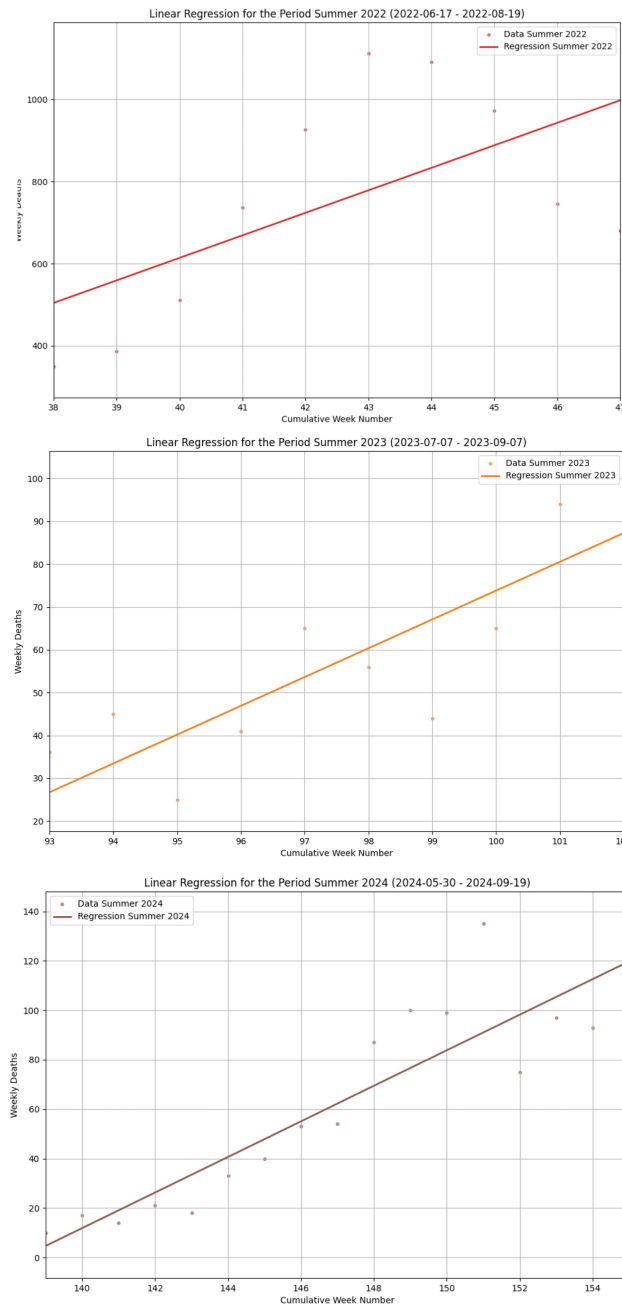

**Figure 3:** Regression segments for the winter periods. Top: Summer 2022 ( $\beta_1 = 54.80$ ,  $\beta_0 = 504.40$ ,  $r^2 = 0.36$ ). Middle: Summer 2023 ( $\beta_1 = 6.72$ ,  $\beta_0 = 26.72$ ,  $r^2 = 0.70$ ), Bottom: Summer 2024 ( $\beta_1 = 7.20$ ,  $\beta_0 = 4.70$ ,  $r^2 = 0.82$ ). Average  $\beta_1 = 22.90$ . Average  $r^2 = 0.63$  (SD 0.19).

To conclude this Section, we report in Figure 5 a comprehensive graphical summary of our results consisting in the initial COVID-19 deaths data time series, divided over the nine different seasonal periods, and with superimposed the regression segments presented in previous Figures 2-4.

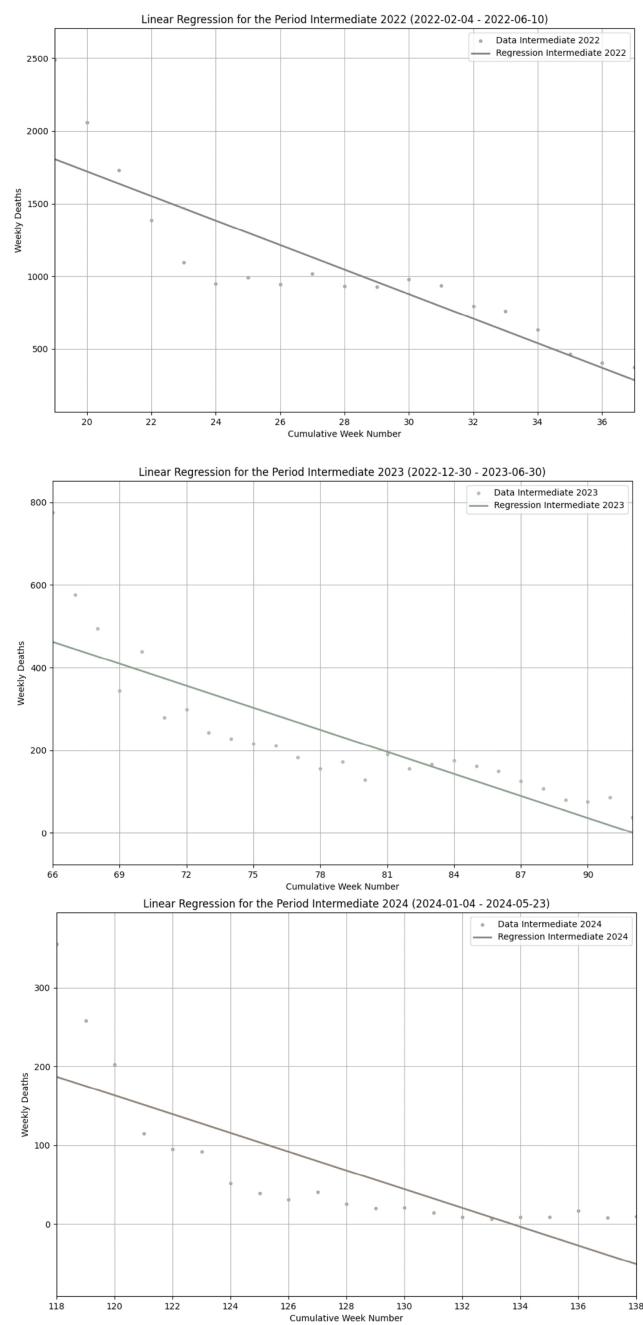

**Figure 4:** Regression segments for the winter periods. Top: Intermediate 2022 ( $\beta_1 = -84.38$ ,  $\beta_0 = 1805.09.70$ ,  $r^2 = 0.77$ ). Middle: Intermediate 2023 ( $\beta_1 = -17.76$ ,  $\beta_0 = 462.91$ ,  $r^2 = 0.71$ ), Bottom: Intermediate 2024 ( $\beta_1 = -11.89$ ,  $\beta_0 = 187.01$ ,  $r^2 = 0.62$ ). Average  $\beta_1 = -38.01$ . Average  $r^2 = 0.70$  (SD 0.06).



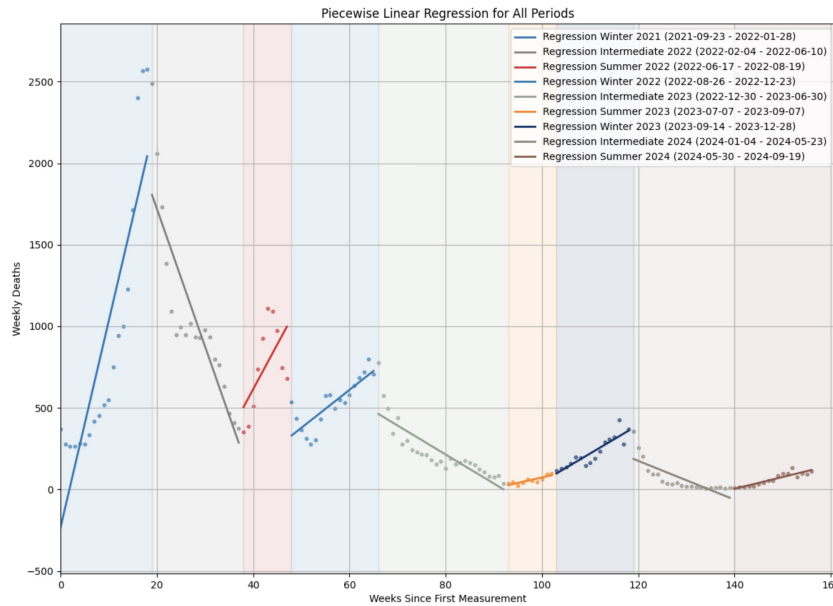

**Figure 5:** A comprehensive graphical summary of the results with: initial COVID-19 deaths data, nine different seasonal periods, superimposed regression segments.

## Discussion

Previous studies have demonstrated that a strong evidence of a sinusoidal seasonal pattern that repeats over a one-year period cannot be found for the COVID-19 illness, at least in Western countries [10, 18, 19]. However, with the present study, we have demonstrated that both ascending and descending seasonal COVID-19 mortality trends can be observed in Italy, over all the time period since September 2021 until September 2024. In particular, the positive slopes of the segments of a piecewise linear regression model, fitted with the COVID-19 deaths data time series of that three-year long period, have revealed the recurrence of ascending COVID-19 mortality trends in all the winters and in the summers of that period, but most pronounced in winters. Instead, the segments associated to all the three intermediate periods, extending from the end of winter to the beginning of summer, with their negative slopes, have revealed descending mortality trends that have played the role to compensate the upward drifts registered during winters and summers, thus contributing to the general decreasing rate of the COVID-19 mortality over the entire period. In the end, these seasonal upward/downward oscillations, repeated at each different season, for three years, have contributed to go from an average number of weekly deaths from COVID-19 of almost 1000 in the period October 2021 - September 2022 to around 100 in the period October 2023 - September 2024 [3, 4].

The first factor to recognize is that our study has scrutinized COVID-19 deaths data from a very specific time period (end 2021- end 2024). The epidemiological landscape was that of when the initial Omicron variant took over in Italy and then diversified into multiple post-Omicron sub-variants that gained an extremely increased survival fitness, leading to pandemic waves recurring in different seasons of the same year [20]. While the mathematical approach we have used to derive our findings remains valid, different results could be obtained examining different pandemic periods with the circulation of different SARS-COV-2 lineages.

We also recognize that this study has avoided identifying the motivations behind the upward/downward seasonal drifts we have described. They can be attributable to several, different causes (or even to a combination of them), including: climatic and environmental factors, social behaviors, like dense people gathering during holidays and vacations or common spreading events, decreasing immunity from previous infections and vaccinations, various kinds of control and prevention measures, and we are aware that further research is necessary to evaluate the role of those triggers and factors in the seasonal variation of mortality from COVID-19 [6]. Nonetheless, while this can be seen as a limitation of our research, we have decided to avoid taking part in the discussion about the causes of the seasonal COVID-19 deaths oscillations, with the precise idea to observe a natural phenomenon only to detect the presence of those seasonal increasing/decreasing mortality trends with neutrality, and regardless of the underlying factors.

Another limitation of our study has been the decision to resort to a very simple mathematical model resulting, in the end, in a segment between two points, to be chosen accurately. We recognize that this method is not the more accurate one with which to count COVID-19 deaths, in general [21, 22, 23]. Nonetheless, it should be considered that the target of our research was not trying to create a model for the count of COVID-19 deaths per each single observation, but to look at how quickly they grew/declined (and especially if the grew/declined), comparing the slopes of the various seasonal trends

over different periods in time. In this sense, our study can be considered less accurate than others in counting COVID-19 deaths [24, 25], but it surely provides a clear identification of the seasonal COVID-19 mortality profiles, thus providing a relevant contribution towards helping that subset of *at risk* population who are seasonally vulnerable, having clearly shown the seasons to take under more control.

Final limitations reside in the use of Italian data. The motivation is twofold. First, the extension to different geographies could result into different results. Second, it is to notice that the data we have used were made available by the Italian Government, under the form of aggregated measures, from two different sources (Civil Protection Department and Ministry of Health). In several cases, those measures have changed value over time, subject to corrections and adjustments, and reaching a relative stability only recently.

## Conclusion

We have fitted a segmented linear regression model to investigate the occurrence of seasonal variations of COVID-19 mortality trends in the period since September 2021 until September 2024, when the SARS-CoV-2 Omicron and post-Omicron variants were mostly predominant in Italy. The slopes of the segments of our regression model have suggested that, despite a general declining trend of the COVID-19 mortality over the entire period of observation, seasonal increasing variations of deaths from COVID-19 have occurred during all the winters and the summers of the period, but they were more pronounced in winters. Since these increasing seasonal alterations of the COVID-19 mortality have been always compensated by consistent downward drifts occurring during the intermediate periods between winters and summers, they have been considered cause for concern, only occasionally. With our research, we argue we have provided an important contribution towards helping that subset of *at risk* population who are seasonally vulnerable, having clearly identified the seasons to consider with more attention.

## Author Contributions

MR and EMDR equally contributed to conceive, design, write, manage, and revise the manuscript.

**Funding:** The authors do not declare a specific grant for this research from any funding agency in the public, commercial or not-for-profit sectors.

**Competing Interests:** None declared

## Research Ethics Approval

Not applicable: neither humans nor animals nor plants nor personal data were involved in this study.

## Data availability statement

The initial COVID-19 deaths data are downloadable from two public, open access repositories, specifically: i) the repository maintained by the Italian Civil Protection Department, under the Italian Presidency of the Council of Ministers ( <https://github.com/pcm-dpc/COVID-19/blob/master/dati-andamento-nazionale> - folder: *dati-andamento-nazionale*), and ii) the repository maintained by the Italian Ministry of Health, (<https://www.salute.gov.it/portale/nuovocoronavirus/archivioBollettiniNuovoCoronavirus.jsp>). The transformed data portrayed in Figure 1, plus the code we developed to fit our segmented regression model, can be downloaded from: [https://github.com/EugenioDeRosa/Covid-19\\_Linear\\_Regression.git](https://github.com/EugenioDeRosa/Covid-19_Linear_Regression.git). All the results of this study are fully reproducible by using the method described in the article and the data and the code available at the above link. Further reasonable requests can be addressed to the corresponding author (email: [marco.rocchetti@unibo.it](mailto:marco.rocchetti@unibo.it)).

## Patient consent for publication

Not required.

## Provenance and peer review

Not commissioned, externally peer reviewed.

## Bibliography

- 1 Maruotti A, Ciccozzi M, Jona.Lasinio G, COVID-19-induced excess mortality in Italy during the Omicron wave. *IJID Regions*, 2022, Volume 4, doi: 10.1016/j.ijregi.2022.07.005
- 2 Bergami M, Bullini Orlandi F, Giuri P, et al, Embracing tensions throughout crises: The case of an Italian university hospital during the COVID-19 pandemic. *Health Care Management Review*, 2022, 49(3), doi: 10.1097/HMR.0000000000000404
- 3 Alicandro G, Gerli A, Remuzzi G, et al, Updated estimates of excess total mortality in Italy during the circulation of the BA.2 and BA.4-5 Omicron variants: April-July 2022. *Work, Environmental and Health*, 2022, 113(5), doi: 10.1097/HMR.0000000000000404
- 4 Mattiuzzi C, Lippi G, Nationwide analysis of COVID-19 death rate throughout the pandemic in Italy. *Journal of Laboratory and Precision Medicine*, 2023, 8(1), doi: 10.21037/jlpm-22-75
- 5 WHO – United Nations, WHO chief declares end to COVID-19 as a global health emergency. *UN News*, 2023, <https://news.un.org/en/story/2023/05/1136367>
- 6 Townsend JP, Hassler HB, Lamb AD, et al, Seasonality of endemic COVID-19. *Journal of American Society for Microbiology*, 2023, 14(6), doi: 10.1128/mbio.01426-23
- 7 Baum F, Freeman T, Musolino C, et al, Explaining COVID-19 performance: what factors might predict national responses? *The BMJ*, 2021, 372(91), doi: 10.1136/bmj.n91
- 8 Casini L, Roccetti M Reopening Italy's schools in September 2020: a Bayesian estimation of the change in the growth rate of new SARS-CoV-2 cases. *BMJ Open*, 2021, 11:e051458, doi: 10.1136/bmjopen-2021-051458
- 9 D'Amico M, Shaman J, Dubrow R, et al., COVID-19 seasonality in temperate countries, *Environmental Research*, 2022, 206(15), doi: 10.1016/j.envres.2021.112614
- 10 Cappi R, Casini L, Tosi D, et al, Questioning the seasonality of SARS-COV-2: a Fourier spectral analysis. *BMJ Open*, 2022, 12:e061602, doi: 10.1136/bmjopen-2022-061602
- 11 Chirumbolo S, Pandolfi S, Valdenassi L, Seasonality of COVID-19 deaths. Did social restrictions and vaccination actually impact the official reported dynamic of COVID-19 pandemic in Italy? *Environmental Research*, 2022, Volume 212, doi: 10.1016/j.envres.2022.11322
- 12 Taljaard M, McKenzie JE, Ramsay CR, et al, The use of segmented regression in analysing interrupted time series studies: an example in pre-hospital ambulance care. *Implementation Science*, 2014, 9(77), doi: 10.1186/1748-5908-9-77
- 13 Wiemken TL, Khan F, Puzniak L, et al, Seasonal trends in COVID-19 cases, hospitalizations, and mortality in the United States and Europe. *Scientific Reports*, 2023, Volume 13, doi: 10.1038/s41598-023-31057-1
- 14 Wong C, Why do covid cases rise in summer? *New Scientist*, 2024, 263(3506), doi: 10.1016/S0262-4079(24)01548-3
- 15 Zhang SX, Marioli A, Gao R, et al., A Second Wave? What Do People Mean by COVID Waves? – A Working Definition of Epidemic Waves. *Risk Management and Healthcare Policy*, 2021, Volume 14, doi: 10.2147/RMHP.S3260515
- 16 Altman N, Krzywinski M, Simple linear regression. *Nature Methods*, 2015, Volume 12, doi: 10.1038/nmeth.3627
- 17 Venturelli F, Mancuso P, Vicentini M, et al, High temperature, COVID-19, and mortality excess in the 2022 summer: a cohort study on data from Italian surveillances. *Science of The Total Environment*, 2023, Volume 887, doi: 10.1016/j.scitotenv.2023.164104
- 18 Fontal A, Bouma MJ, San-José A, et al., Climatic signatures in the different COVID-19 pandemic waves across both hemispheres, *Nature Computational Science*, 2021, Volume 1, doi: 10.1038/s43588-021-00136-6
- 19 Sera F, Armstrong B, Abbott S, et al., A cross-sectional analysis of meteorological factors and SARS-CoV-2 transmission in 409 cities across 26 countries. *Nature Communications*, 2021, 12(1), doi: 10.1038/s41467-021-25914-8
- 20 Stefanelli P, Trentini F, Petrone D, et al., Tracking the progressive spread of the SARS-CoV-2 Omicron variant in Italy, December 2021 to January 2022. *Eurosurveillance*, 2022, 27(45), doi: 10.2807/1560-7917.ES.2022.27.45.2200125
- 21 Khajanchi S, Sarkar K, Mondal J, et al., Mathematical modeling of the COVID-19 pandemic with intervention strategies. *Results in Physics*, 2021, Volume 25, doi: 10.1016/j.rinp.2021.104285
- 22 Hao B, Liu C, Wang Y, et al., A mathematical-adapted model to analyze the characteristics for the mortality of COVID-19. *Scientific Reports*, 2022, Volume 12, doi: 10.1038/s41598-022-09442-z
- 23 Roccetti M, Drawing a parallel between the trend of confirmed COVID-19 deaths in the winters of 2022/2023 and 2023/2024 in Italy, with a prediction. *Mathematical Biosciences and Engineering*, 2023, 21(3), doi: 10.3934/mbe.2024165
- 24 Tosi D, Campi A, How Data Analytics and Big Data Can Help Scientists in Managing COVID-19 Diffusion: Modeling Study to Predict the COVID-19 Diffusion in Italy and the Lombardy Region, *Journal of Medical Internet Research*, 2020, 22(10), doi: 10.2196/21081
- 25 Roccetti M, Excess mortality and COVID-19 deaths in Italy: A peak comparison study. *Mathematical Biosciences and Engineering*, 2023, 20(4), doi: 10.3934/mbe.2023304
